# Supplementary material for: N-Acetylglutamic Acid Enhances Tolerance to Oxidative and Heat Stress in Humulus lupulus
Source: MDPI journal article supplement (doi:10.3390/horticulturae10050484), 2024-05-08
Supplement: s1 [file s1]

Archive with 2 entries (2 files):
- Horticulturae_Supplementary Figures.pdf
- Horticulturae_Supplementary Table S1.xlsx
