# Supplementary material for: N-Acetylglutamic Acid Enhances Tolerance to Oxidative and Heat Stress in Humulus lupulus
Source: MDPI journal article supplement (doi:10.3390/horticulturae10050484), 2024-05-08
Supplement: s1 [file s1 › Horticulturae_Supplementary Table S1.xlsx]

## Sheet: Sheet1
	Name	ID in Hopbase	Sequence (5' → 3')	Experiment
	HlEF1α_RT_F	HL.SW.v1.0.G029319.1	TTTTGCTGTCAGGGACATGC	qPCR
	HlEF1α_RT_R		TTGGCAGCGGATTTGGTAAC	qPCR
	HlZAT10_RT_F	HL.SW.v1.0.G026687.1	CAATTCTCCAACCACGGCTAAC	qPCR
	HlZAT10_RT_R		ATGGCTCGTGGAATTGGAGAG	qPCR
	HlZAT12_RT_F	HL.SW.v1.0.G020446.1	CCTGGACATGGCTAATTGCTTG	qPCR
	HlZAT12_RT_R		AAGTCTTGCAAGCGAACACG	qPCR
	HlAOX1a_RT_F	HL.SW.v1.0.G010118.1	CAGCAGCGCAGTTTATTTGG	qPCR
	HlAOX1a_RT_R		TGATGCTCACCGTTTTCAGC	qPCR
	HlAPX1_RT_F	HL.SW.v1.0.G001711.1	ATGCTGCGGATGAAGATTGC	qPCR
	HlAPX1_RT_R		TTAGGCGTCGGCAAATCCTAG	qPCR
	HlHSFA2_RT_F	HL.SW.v1.0.G038292.1	TGTGCCGTGAGTTTCTGAAC	qPCR
	HlHSFA2_RT_R		ATAAGGGGGAGTAGCAAGCG	qPCR
	HlACTIN2_RT_F	scaffold_1318	TGGTGAATGTCAACTTGGCAAG	ChIP-qPCR
	HlACTIN2_RT_R		AATTGCCTTTGCTGCTCTGC	ChIP-qPCR
	HlZAT10_ChIP_F	scaffold_73716	AACCCATTCTCCACCTACAACC	ChIP-qPCR
	HlZAT10_ChIP_R		AAGGTACTCTTCTTCGGATGGC	ChIP-qPCR
	HlZAT12_ChIP_F	scaffold_167420	TGTGCCGTGAGTTTCTGAAC	ChIP-qPCR
	HlZAT12_ChIP_R		ATAAGGGGGAGTAGCAAGCG	ChIP-qPCR
	HlHSFA2_ChIP_F	scaffold_57257	TGTGCCGTGAGTTTCTGAAC	ChIP-qPCR
	HlHSFA2_ChIP_R		ATAAGGGGGAGTAGCAAGCG	ChIP-qPCR
